1 Title: Characterizing changes in glucocorticoid receptor internalization in the fear circuit in an animal  
2 model of post traumatic stress disorder

3 Running title: stress, GR, fear conditioning

4 Emly Moulton<sup>1</sup>, Marisa Chamness<sup>1</sup>, and Dayan Knox<sup>1</sup>.

5 1. Department of Psychological and Brain Sciences, University of Delaware, Newark DE 19716

6

7 Correspondence should be sent to Dayan Knox, 217 Wolf Hall, Department of Psychological and Brain

8 Sciences, University of Delaware, Newark DE. Phone: 302-831-7577, fax: 302-831-3645, email:

9 [dknox@psych.udel.edu](mailto:dknox@psych.udel.edu).

10 Keywords: Single prolonged stress, PTSD, fear extinction, fear conditioning, glucocorticoid receptor.

11

12

13

14

15

16

17

18

19

20

21

22

23

24

25  
26  
27  
28  
29  
30  
31  
32  
33  
34  
35  
36  
37  
38  
39  
40  
41  
42  
43  
44  
45  
46  
47  
48  
49  
50

## ABSTRACT

Glucocorticoid receptors (GRs) shuttle from the cytoplasm (cy) to the nucleus (nu) when bound with glucocorticoids (i.e. GR internalization) and alter transcriptional activity. GR activation within the fear circuit has been implicated in fear memory and post traumatic stress disorder (PTSD). However, no study to date has characterized GR internalization within the fear circuit during fear memory formation or examined how traumatic stress impacts this process. To address this, we assayed cy and nu GR levels at baseline and after auditory fear conditioning (FC) in the single prolonged stress (SPS) model of PTSD. Cy and nu GRs within the medial prefrontal cortex (mPFC), dorsal hippocampus (dHipp), ventral hippocampus (vHipp), and amygdala (AMY) were assayed using western blot. The distribution of GR in the cy and nu (at baseline and after FC) was varied across individual nodes of the fear circuit. At baseline, SPS enhanced cyGRs in the dHipp, but decreased cyGRs in the AMY. FC only enhanced GR internalization in the AMY and this effect was attenuated by SPS exposure. SPS also decreased cyGRs in the dHipp after FC. The results of this study suggests that GR internalization is varied across the fear circuit, which in turn suggests GR activation is selectively regulated within individual nodes of the fear circuit. The findings also suggest that changes in GR dynamics in the dHipp and AMY modulate the enhancing effect SPS has on fear memory persistence.

51 **INTRODUCTION**

52           Glucocorticoid receptors (GRs) are ligand-gated transcription factors. Upon binding with  
53 glucocorticoids they leave the cytoplasm (cy) and enter the nucleus (nu) as dimers (i.e. GR  
54 internalization) where they bind to GREs to regulate transcription (1-4). GRs can also enter the nucleus as  
55 monomers and interact with other transcription factors (e.g. AP-1) to indirectly regulate transcriptional  
56 activity (2).

57           Glucocorticoid release during fear conditioning (FC) has been implicated in fear memory  
58 consolidation (5-8) and specifically GR activation in the basolateral amygdala (BLA) and dorsal  
59 hippocampus (dHipp) are critical for fear memory consolidation (9-12). Changes in GR function have  
60 been consistently implicated in post traumatic stress disorder (PTSD) with an enhancement in GR levels  
61 (inferred via hormonal experiments or direct measurement on lymphocytes) being reported (13-20).  
62 Given the role of GRs in fear memory consolidation, it is reasonable to infer that enhanced GR expression  
63 in PTSD contributes to persistent traumatic fear memory that is characteristic of PTSD (21-23). However,  
64 other studies have shown that administration of glucocorticoids shortly after trauma prevent the  
65 development of PTSD (24, 25) and can enhance the efficacy of exposure therapy in treating PTSD (26).  
66 Thus, it is currently unclear how GRs contribute to PTSD symptoms. Indeed characterization of GR  
67 internalization across the fear circuit during fear memory formation and how this process is affected by  
68 traumatic stress is lacking.

69           Single prolonged stress (SPS) refers to serial exposure to restraint, forced swim, and ether and is a  
70 validated animal model of PTSD (27-29). SPS exposure increases GR expression in the dHipp and mPFC  
71 (30-33) and leads to the formation of fear memory that is difficult to extinguish (i.e. persistent fear  
72 memory) (31, 32, 34-37). These two symptoms are characteristic of PTSD (18, 20, 38-40). Thus, SPS is  
73 an appropriate animal model to examine how traumatic stress might lead to changes in GR internalization  
74 in the fear circuit. In this study we used western blot to assay cy and nu GRs in the medial prefrontal  
75 cortex (mPFC), amygdala (AMY), dHipp, and ventral Hipp (vHipp) at baseline and after FC (see Figure  
76 1).

77 -----Figure 1 caption-----

78 Experimental design used in this study.

79 -----Figure 1 caption-----

80

81 These substrates were selected, because they are critical nodes of the fear circuit (41-45). Results  
82 suggest that distribution of GRs in the cy and nu at baseline and after FC was varied across these nodes of  
83 the fear circuit. The effects of SPS on cy and nu GR levels at baseline and after FC was restricted to the  
84 dHipp and AMY. SPS increased cyGR levels in the dHipp at baseline, but decreased cyGR levels in the  
85 dHipp after FC. SPS decreased cyGR levels in the AMY at baseline, but increased cyGR levels in the  
86 AMY after FC. SPS also disrupted GR internalization in the AMY brought on by FC.

## 87 MATERIAL AND METHODS

### 88 Animals

89 Eighty-eight male Sprague-Dawley rats (~ 150 – 250 g upon arrival) obtained from Charles River  
90 Inc. were used in this study. Upon arrival, rats were housed in pairs during a five day acclimation period  
91 with ad libitum access to food and water. Following SPS and control procedures, rats were individually  
92 housed and restricted to 23g/day of standard rat chow per the manufacturer's recommendation (LabDiet  
93 St. Louis MO) with ad libitum access to water. Experiments commenced following the animals'  
94 acclimation period. The rats were on a 12 hour light/dark cycle and all experimental procedures were  
95 performed in the animals' light cycle between the hours of 9:00 am and 2:00pm. All experiments were  
96 approved by the University of Delaware Institutional Animal Care and Use committee following  
97 guidelines established by the NIH.

### 98 SPS and Behavioral Procedures

99 All rats were randomly assigned to the SPS or control stress group prior to SPS. SPS was  
100 conducted as previously described (33, 46) and consisted of two hours of restraint, followed by 20  
101 minutes of forced swim, then ether exposure until general anesthesia was induced. Control rats were  
102 placed into a novel room in their home cages while SPS occurred. A post-stress incubation period of

103 seven days was allowed to elapse prior to experimental testing, because this is necessary to observe SPS  
104 effects (32, 33).

105 SPS and control rats were randomly assigned to one of four groups: baseline, FC0, FC30, or  
106 FC60. Rats in the baseline treatment were removed from the housing colony and immediately euthanized  
107 in order to determine baseline GR levels. All other rats were removed from the housing colony and  
108 subjected to FC. FC sessions were conducted as previously described (32, 34) using six MedAssociates  
109 (Fairfax VT) operant boxes. Briefly, FC consisted of five presentations of a 10 second auditory  
110 conditioned stimulus (CS, 2 kHz, 80dB) that co-terminated with a 1 second, 1mA footshock  
111 unconditioned stimulus (UCS). All FC sessions began with a 210s baseline period and had inter-stimulus  
112 intervals (ISIs) of 60s. All rats subjected to FC were removed from the operant boxes and euthanized  
113 either immediately (FC0), 30 minutes (FC30), or 60 minutes (FC60) following the cessation of FC. These  
114 time points were selected, because previous studies have shown that corticosterone levels are elevated  
115 immediately after FC, sustained for approximately 30 minutes, but after this time point begins to decrease  
116 (47-49). As a result, these time points are appropriate for examining changes in GR internalization  
117 induced by enhanced adrenal corticosterone release.

118 All animals were euthanized via rapid decapitation and their brains were immediately extracted  
119 and flash frozen in isopentane chilled on dry ice. Brains were then stored in a -80°C freezer until further  
120 processing. To dissect brain regions, brains were thawed to -13°C cryostat (Leica CM1350) and 300 µm  
121 coronal sections through the mPFC, AMY, dHipp, and vHipp were taken and these brain regions  
122 dissected out and placed into 1.5 mL microtubes. Dissected brain regions in microtubes were then stored  
123 in a -80°C freezer.

#### 124 **Western Blot**

125 All brain sections were treated to separate cy and nu fractions using a method described by  
126 Spencer et al., (50). We empirically tested this protocol to ensure it was successful at separating cy and nu  
127 fraction (see Appendix). Dissected brain regions were homogenized in 250 µL of buffer (50mM Tris

128 buffer, 10% sucrose, 1mM EDTA, 0.5mM DTT, 1mM benzamidine, 0.3mM PMS Fl) by a motor-driven  
129 homogenizer (Fisher Scientific, PowerGen125). The homogenate was then then centrifuged (2,000 x g)  
130 for five minutes at 4°C to obtain a supernatant and rough pellet. The supernatant was centrifuged at  
131 14,800 x g for 45 minutes at 4°C and the supernatant treated as the cy fraction of brain tissue.

132 The rough pellet from the initial centrifuge treatment was used to obtain the nu fraction from  
133 dissected brain regions. The pellet was washed twice in 400  $\mu$ L of buffer and then resuspended in 150  $\mu$ L  
134 of buffer that had a high concentration of NaCl (50mM Tris buffer, 0.5M NaCl, 10% sucrose, 1mM  
135 EDTA, 0.5mM DTT, 1mM benzamidine, 0.3mM PMS Fl). Samples were placed on a fixed speed vortex  
136 mixer and the suspension was incubated in ice for 1 hour with frequent shaking. Following incubation,  
137 samples were centrifuged at 8,000 x g for 15 minutes at 4°C. The supernatants from these samples were  
138 treated as the nu fraction of brain tissue.

139 The protein concentration of cy and nu fractions were increased using protein concentrator  
140 columns (GE Healthcare, Vivaspin 500). Protein assay was then performed on each sample per  
141 manufacturer's directions (Pierce BCA Protein Assay Kit). 0.5X Laemmli sample buffer was mixed with  
142 approximately 15  $\mu$ g of protein from each sample. These samples were stored in a -80°C until western  
143 blot. Protein samples were heated at 70°C for 7 minutes before being loaded into 10% Tris-HCl  
144 polyacrylamide gels and separated by SDS polyacrylamide gel electrophoresis. Separated proteins were  
145 electrophoretically transferred from gels to nitrocellulose membranes. The membranes were subsequently  
146 left to dry for 30 minutes at 37°C followed by rehydration washes in 0.5 M Tris-buffered saline (TBS).  
147 Blots were blocked for 1 hour at room temperature in TBS containing 5% non-fat milk. Nitrocellulose  
148 membranes were probed for GR and  $\beta$  actin (reference protein) by incubating overnight at room  
149 temperature with a polyclonal rabbit GR antibody (1:50, Santa Cruz Biotechnology, M-20) and a mouse  
150  $\beta$ -actin antibody (1:2000, Cell Signaling Inc. 8H10D10) in TBS. After 18-20 hours, the membranes were  
151 subjected to several washes in 0.5 M TBS with 0.1% Tween-20 then a 3 hour incubation at room  
152 temperature with polyclonal goat anti-rabbit (800CW) (1:500, Li-COR) and anti-mouse IgG (680RD)

153 (1:5000, Li-COR) secondary antibodies in 0.5M TBS containing 0.1% Tween and 5% non-fat milk.

154 Nitrocellulose membranes were then washed in TBS and scanned in the Li-cor Odyssey Clx scanner

155 under the following settings: resolution – 169  $\mu$ m, quality – lowest, focus offset – 0.0 mm.

## 156 **Data and Statistical Analysis**

157 Freezing behavior was analyzed using ANY-maze (Stoelting Inc.) as previously described (32).

158 Fear-conditioned freezing was averaged in trials that consisted of a CS and respective ISI (e.g. CS1 and

159 IS1) and analyzed using a stress (SPS vs. control)  $\times$  trial (baseline, trials 1–5) factor design, with trial

160 being a repeated measure. The condition factor was pooled because rats in the FC0, FC30, and FC60

161 levels were treated in an identical manner during FC.

162 In order to reduce variability in western blot data, representative rats from each independent

163 factor (i.e. stress and condition) were always included in each protein assay and western blot. The

164 integrated intensity (I.I.) of GR and  $\beta$ -actin protein bands were scored using ImageStudio. The profile

165 curves of all bands were inspected to ensure that there was significant I.I. signal above the background

166 within each lane in every western. For all statistical analyses cyGR and nuGR were expressed relative to

167 cy $\beta$ -actin and nu $\beta$ -actin to yield relative GR levels. We also divided relative nuGR levels (nuGR/nuAct)

168 into relative cyGR levels (cyGR/cyAct) to yield a single measure of GR internalization (i.e. nGR/cGR) in

169 all brain regions.

170 A stress  $\times$  fraction (cy vs. nu) factor design was used to examine the effect of SPS on relative

171 cyGR and nuGR levels at baseline, with fraction being a repeated measure. T-test (SPS vs. control) was

172 used to analyze baseline nGR/cGR ratios. A stress  $\times$  fraction  $\times$  condition (FC0, FC30, FC60) factor design

173 was used to examine changes in relative cyGR and nuGR levels after FC. A stress  $\times$  condition factor

174 design was used to examine changes in nGR/cGR ratios. To specifically examine how cyGR and nuGR

175 levels changed after FC, relative cyGR, nuGR, and nGR/cGR ratios in the condition factor were

176 expressed as a percent change from baseline. These normalized values were subjected to separate stress  $\times$

177 condition factor designs.

178 Main and simple effects were analyzed using analysis of variance (ANOVA), while main and  
179 simple comparisons were analyzed using independent, paired sample, or one sample t-test with a  
180 Bonferroni correction applied where appropriate. The reference value for all one sample t-tests was set to  
181 100. Statistical significance was assumed with  $p < .05$  for all statistical tests.

## 182 RESULTS

### 183 Behavior

184 There was a main effect of trial [ $F_{(5,125)} = 127.615, p < .001$ ], which suggested all rats acquired  
185 fear memory. There was also a significant stress x trial interaction [ $F_{(5,125)} = 2.669, p = .036$ ]. This was  
186 driven by enhanced freezing in SPS rats during FC trial 1 of FC in comparison to control rats [ $t_{(25)} =$   
187  $2.268, p = .032$ ]. However, at the end of FC all animals had equivalent levels of freezing ( $p > .05$ ), which  
188 suggests SPS did not alter acquisition of FC; a finding consistent with previous studies (31, 32, 34). These  
189 results are illustrated in Figure 2.

190

191 -----Figure 2 caption-----

192 Effect of SPS on acquisition of fear conditioning (FC). Even though SPS enhanced conditioned freezing  
193 during trial 1 of FC, SPS did not affect acquisition of FC. SPS = 15, control = 12.

194 -----Figure 2 caption-----

195

### 196 Western Blot

#### 197 *vHipp*

198 Sample western is shown in Figure 3A.

199

200 -----Figure 3 caption-----

201 Effect of SPS on GR internalization in the vHipp. A) Cartoon of dissected brain region and representative  
202 western of cytoplasmic (cy) and nuclear (nu) vHipp samples. B) SPS had no effect on baseline GR levels  
203 or nGR/cGR ratios (SPS = 12, Con = 13). C) Cy GR levels were enhanced during FC. SPS had no effects



204 on relative GR levels or nGR/cGR ratios after FC. D) SPS had no effect on normalized GR levels or  
205 nGR/cGR ratios, but both cy and nu GR levels were enhanced relative to baseline levels. Also, nGR/cGR  
206 levels after FC were decreased relative to baseline. + - significant one-sample t-test. SPS/0' = 12, SPS/30'  
207 = 8, SPS/60' = 9; Con/0' = 11, Con/30' = 7, Con/60' = 7.

208 -----Figure 3 caption-----

209  
210 Relative baseline GR levels and nGR/cGR ratios were unaffected by stress and relative baseline cyGR  
211 and nuGR levels were equivalent (Figure 3B,  $p > .05$ ). However, there was a rise in cyGR levels, relative  
212 to nuGR levels, after FC. This was revealed by a main effect of fraction [ $F_{(1,48)} = 11.149$ ,  $p = .001$ ; Figure  
213 3C]. There were no stress or condition effects on relative GR levels or nGR/cGR ratios after FC (Figure  
214 3C;  $p > .05$ ). There was no effect of stress on normalized GR levels after FC ( $p > .05$ ). However, there  
215 was an enhancement in both cy and nu GR levels brought on by FC across all time points (i.e. 0', 30',  
216 60'). This was revealed by significant one-sample t-test [cyGR -  $t_{(53)} = 2.831$ ,  $p = .014$ ; nuGR -  $t_{(53)} =$   
217  $2.525$ ,  $p = .03$ ]. Normalized nGR/cGR ratios were unaffected by stress ( $p > .05$ ), but were significantly  
218 lower after FC in comparison to baseline [ $t_{(53)} = 4.976$ ,  $p < .001$ ]. This suggests GR internalization in the  
219 vHipp was decreased after FC. These results are illustrated in Figure 3D.

## 220 *dHipp*

221 A sample western is shown in Figure 4A.

222

223 -----Figure 4 caption-----

224 Effect of SPS on GR internalization in the dHipp. A) Cartoon of dissected brain region and representative  
225 western of cy and nu dHipp samples. B) At baseline, cy GR levels were enhanced relative to nu GR levels  
226 and this enhancement was further increased in SPS rats. SPS had no effect on nGR/cGR ratios (SPS = 9,  
227 Con = 13). C) Cy GR levels, relative to nu GR levels, were enhanced after FC. SPS had no effects on  
228 relative GR levels or nGR/cGR ratios after FC. D) Normalized cy GR levels in SPS rats were enhanced  
229 relative to control rats. This effect was most pronounced at the FC-60 time point. One sample t-test

230 revealed that SPS decreased normalized cy GR levels after FC. SPS had no effect on normalized nu GR  
231 levels or nGR/cGR ratio. \* - significant effect of stress. + - significant one-sample t-test. SPS/0' = 10,  
232 SPS/30' = 8, SPS/60' = 9; Con/0' = 12, Con/30' = 9, Con/60' = 6.

233 -----Figure 4 caption-----

234  
235 There was a main effect of fraction [ $F_{(1,20)} = 57.529$ ,  $p < .001$ ] for relative GR at baseline. This reflected  
236 enhanced cyGR, relative to nuGR, in the dHipp. There was also a significant stress x fraction interaction  
237 [ $F_{(1,20)} = 7.345$ ,  $p = .013$ ], which was driven by SPS enhancement of cyGR relative to nuGR. This  
238 assertion was supported by significant t-test when comparing difference scores between relative cy and nu  
239 GR levels (i.e. cyGR – nuGR) for SPS vs. control rats [ $t_{(20)} = 2.71$ ,  $p = .013$ ]. Independent t-test for  
240 baseline nGR/cGR ratios was not significant ( $ps > .05$ ). These results are illustrated in Figure 4B.

241 Relative cyGR was higher when compared to nuGR [main effect of fraction:  $F_{(1,48)} = 27.056$ ,  $p <$   
242  $.001$ ] after FC. There were no significant effects of stress and/or condition ( $ps > .05$ ). There were no  
243 stress and/or condition effects for nGR/cGR ratios after FC ( $ps > .05$ ). These results are illustrated in  
244 Figure 4C. There was a main effect of stress for normalized cyGR levels [ $F_{(1,48)} = 5.707$ ,  $p = .021$ ] that  
245 was driven by lower levels of cyGR in SPS rats. This effect was pronounced at the FC60 time point.  
246 Significant one sample t-test for SPS rats [ $t_{(26)} = 3.624$ ,  $p = .001$ ], but not control rats ( $p > .05$ ), also  
247 supported the assertion that cyGR levels were decreased in SPS rats after FC. There were no significant  
248 stress and/or condition effects on relative nuGR levels or nGR/cGR ratios after FC ( $ps > .05$ ). These  
249 results are illustrated in Figure 4D.

250 *AMY*

251 A sample western is shown in Figure 5A.

252  
253 -----Figure 5 caption-----

254 Effect of SPS on GR internalization in the AMY. A) Cartoon of dissected brain region and representative  
255 western of cy and nu AMY samples. B) Relative cy GR levels were enhanced in comparison to nu GR

256 levels. This effect was decreased in SPS rats. This effect approached statistical significance ( $p = .057$ ).  
257 SPS had no effect on nGR/cGR ratios at baseline (SPS = 6, control = 10). C) Cy GR levels were enhanced  
258 during FC. SPS had no effects on relative GR levels or nGR/cGR ratios after FC. D) SPS enhanced  
259 normalized cy GR levels. This effect approached statistical significance ( $p = .064$ ). Enhanced nGR/cGR  
260 ratios after FC were observed in control rats, which suggests enhanced GR internalization. This effect was  
261 not observed in SPS rats. + - significant one-sample t-test. \* significant effect of stress. SPS/0' = 7,  
262 SPS/30' = 5, SPS/60' = 6; Con/0' = 8, Con/30' = 7, Con/60' = 4.

263

264 -----Figure 5 caption-----

265 Effect of SPS on GR internalization in the AMY. A) Cartoon of dissected brain region and representative  
266 western of cy and nu AMY samples. B) Relative cy GR levels were enhanced in comparison to nu GR  
267 levels. This effect was decreased in SPS rats. This effect approached statistical significance ( $p = .057$ ).  
268 SPS had no effect on nGR/cGR ratios at baseline (SPS = 6, control = 10). C) Cy GR levels were enhanced  
269 during FC. SPS had no effects on relative GR levels or nGR/cGR ratios after FC. D) SPS enhanced  
270 normalized cy GR levels. This effect approached statistical significance ( $p = .064$ ). Enhanced nGR/cGR  
271 ratios after FC were observed in control rats, which suggests enhanced GR internalization. This effect was  
272 not observed in SPS rats. + - significant one-sample t-test. \* significant effect of stress. SPS/0' = 7,  
273 SPS/30' = 5, SPS/60' = 6; Con/0' = 8, Con/30' = 7, Con/60' = 4.

274 -----Figure 5 caption-----

275

276 There was a significant main effect of fraction [ $F_{(1,14)} = 28.224, p < .001$ ] for baseline relative GR,  
277 which reflected enhanced cyGR levels relative to nuGR. This effect was attenuated in SPS rats, which  
278 was suggested by a stress x fraction interaction that approached significance [ $F_{(1,14)} = 4.307, p = .057$ ].  
279 There was no effect of stress on baseline nGR/cGR ratios ( $p > .05$ ). These results are illustrated in Figure  
280 5B.

281 CyGR levels were enhanced, relative to nuGR, after FC in all rats. This revealed by a significant  
282 main effect of fraction [ $F_{(1,31)} = 48.734, p < .001$ ]. There were no effects of stress and/or condition on  
283 relative GRs or nGR/cGR ratios after FC ( $ps > .05$ ). Relative to baseline, cyGR increased after FC in SPS  
284 rats, but not control rats. This was suggested by a stress effect that approached statistical significance  
285 [ $F_{(1,32)} = 3.672, p = .064$ ]. These results are illustrated in Figure 5C. There were no effects of stress and/or  
286 condition on normalized cy and nu GR levels ( $ps > .05$ ). There was a main effect of stress on normalized  
287 nGR/cGR ratios [ $F_{(1,31)} = 5.607, p = .024$ ], which was driven by a failure to enhance nGR/cGR ratios after  
288 FC in SPS rats. This interpretation was supported by one sample t-test that was significant for control rats  
289 [ $t_{(18)} = 2.637, p = .034$ ], but not SPS rats ( $p > .05$ ). These findings suggests that FC enhanced GR  
290 internalization in the AMY and this effect was attenuated by SPS (see Figure 5D).

#### 291 *mPFC*

292 A sample western is shown in Figure 6A.

293

294 -----Figure 6 caption-----

295 Effect of SPS on GR internalization in the mPFC. A) Cartoon of dissected brain region and representative  
296 western of cy and nu mPFC samples. B) SPS had no effect on baseline GR levels or nGR/cGR ratios, but  
297 cy GR levels were enhanced relative to nu GR levels (SPS = 7, control = 9). C) Relative cy GR levels  
298 were enhanced during FC. SPS had no effects on relative GR levels or nGR/cGR ratios after FC. D) SPS  
299 had no effect on normalized GR levels or nGR/cGR ratios. \* significant effect of stress. SPS/0' = 8,  
300 SPS/30' = 4, SPS/60' = 5; Con/0' = 6, Con/30' = 5, Con/60' = 4.

301 -----Figure 6 caption-----

302

303 There was a main effect of fraction [ $F_{(1,14)} = 10.147, p = .007$ ] for relative baseline GR, which reflected  
304 enhanced cyGR, relative to nuGR, in the mPFC. There was no significant stress effect for relative  
305 baseline GR levels or nGR/cGR ratios (Figure 6B;  $ps > .05$ ). Relative cyGR levels after FC was enhanced  
306 in comparison to nuGR levels. This was revealed by a main effect of fraction [ $F_{(1,26)} = 4.367, p = .047$ ].

307 There were no stress and/or condition effects on relative GR levels or nGR/cGR ratios after FC (Figure  
308 6C;  $ps > .05$ ). There was no effect of stress and/or condition on normalized GR levels or nGR/cGR ratios  
309 after FC (Figure 6D;  $ps > .05$ ).

## 310 DISCUSSION

311 By examining changes in GR levels in the cy and nu at baseline and after FC in different neural  
312 substrates that comprise the fear circuit we were able to examine how the distribution of GRs in the cy  
313 and nu (i.e. GR dynamics) changes with SPS exposure and after FC. The results suggest there is selective  
314 regulation of GR dynamics within individual neural substrates of the fear circuit at baseline and with FC.  
315 Baseline cyGR was enhanced relative to nuGR in all brain regions except for the vHipp. FC had no effect  
316 on GR dynamics in the mPFC and dHipp, but increased cy and nu GR levels in the vHipp. In spite of this  
317 there was an overall decrease in vHipp GR internalization after FC. Enhanced GR internalization after FC  
318 was only observed in the AMY. Thus, glucocorticoid release (whether at baseline or stress-induced) does  
319 not uniformly determine GR trafficking between the cy and nu within the fear circuit.

320 SPS disrupted GR dynamics in the dHipp and AMY at baseline and after FC, with cyGRs being  
321 sensitive to SPS in both brain regions. SPS enhanced cyGRs in the dHipp, but decreased cyGRs in the  
322 AMY at baseline. These effects were inverted after FC with lower cyGRs in the dHipp of SPS rats, but  
323 enhanced cyGRs in the AMY. The enhancement in GR internalization in the AMY observed in control  
324 rats was disrupted by SPS. A previous study has observed that systematically inhibiting GR activation  
325 during FC exacerbates persistent fear memory induced by SPS exposure without having any effect on  
326 non-stressed rats (35). Inhibiting GR activation during FC may further inhibit GR internalization in AMY  
327 cells and decrease cyGR activation in dHipp cells. Via these processes, inhibiting GR activation during  
328 FC may enhance persistent fear memory in the SPS model. In turn, this suggests that the changes in GR  
329 function brought on by SPS can be adaptive, where GR activation during FC inhibits the development of  
330 fear memory persistence in the SPS model.

331 Previous studies have also shown that GR activation in the dHipp and AMY enhance memory  
332 consolidation in non-stressed rats (see Introduction), which at first appears contrary to the hypothesis that

333 GR activation during FC inhibits persistent fear memory in the SPS model. One explanation of this  
334 apparent discrepancy is that SPS alters GR function in the dHipp and the AMY such that activation of  
335 GRs induce different cellular effects in SPS rats when compared to non-stressed rats. Alternatively, a  
336 decrease in GR activation tends to disrupt stress adaptation (5). By decreasing GR internalization in the  
337 AMY and availability of cyGRs in the dHipp after FC, SPS may prolong the stress of FC, which renders  
338 fear memory more resistant to the inhibitory effects of extinction. Indeed previous studies have observed  
339 that the stress of FC inhibits the formation of extinction memory (51). Further research is needed to  
340 examine these possibilities.

### 341 **Substrate specific regulation of GR dynamics in the fear circuit**

342 How might substrate specific regulation of GR dynamics occur in the fear circuit when the ligand  
343 that activates GRs originates from a single source outside of the central nervous system (i.e. adrenal  
344 cortex)? 11 $\beta$ -hydroxysteroid dehydrogenase types 1 and 2 (11 $\beta$ -HSD1, 11 $\beta$ -HSD2) are enzymes capable  
345 of either converting inert 11-keto forms of glucocorticoids (e.g. 11 dehydrocorticosterone) into active  
346 glucocorticoid (11 $\beta$ -HSD1) or metabolizing glucocorticoids (11 $\beta$ -HSD2). Via these mechanisms substrate  
347 specific levels of glucocorticoids can be achieved within the brain (52, 53). Both enzymes have selective  
348 expression in the brain, with high levels of 11 $\beta$ -HSD1 being restricted to the neocortex, hippocampus,  
349 and hypothalamus; and moderate levels of 11 $\beta$ -HSD2 being expressed in selective neurons in the nucleus  
350 of the solitary tract (54-57). Interestingly, genetic deletion of 11 $\beta$ -HSD1 results in stress resiliency (58).

351 GRs are phosphorylated at various sites, which alters GR function, including GR internalization  
352 (1, 59, 60). Substrate specific changes in GR phosphorylation status is observed with chronic stress and  
353 SPS (61, 62) and could be a mechanism whereby GR dynamics is selectively regulated within the fear  
354 circuit. FKBP5 is a chaperone protein for GR that inhibits GR binding by interacting with heat shock  
355 protein 90 (63-65) and has been implicated in the etiology of PTSD (47, 63, 66). These chaperone  
356 proteins have the potential to regulate GR dynamics in a substrate-specific manner by selectively  
357 lowering GR binding within neural substrates. In this study we observed rapid increases in cy and nu  
358 vHipp GRs that occurred immediately after FC and these changes may also be somewhat independent of

359 GR internalization (see Results). Further research examining how rapid changes in GR availability might  
360 be achieved is needed, as these processes could be critical for substrate-specific regulation of GR  
361 activation in the fear circuit.

### 362 **Summary**

363 The results of this study demonstrate that GR dynamics are varied in different neural substrates  
364 that comprise the fear circuit. This suggests that basal glucocorticoid release and stress-enhanced adrenal  
365 glucocorticoid release can have varied effects on the fear circuit via local regulation of GR activation.  
366 Furthermore, the effect of traumatic stress on GR dynamics at baseline and during fear memory formation  
367 are restricted to specific nodes within the fear circuit. Previous studies have shown that glucocorticoid  
368 administration shortly after trauma (24, 25) and during exposure therapy (26) can prevent and treat the  
369 development of PTSD. It is very likely that these treatments do not have homogenous effects on GR  
370 dynamics in the fear circuit. Characterizing how these treatments change GR dynamics at baseline and  
371 during emotional memory phenomena (e.g. FC, fear extinction) in animals models of PTSD is needed to  
372 better understand how they work and implement them in the treatment of PTSD.

373

374

375

376

377

378

379

380

381

382

383

384  
385  
386  
387  
388  
389  
390  
391  
392  
393  
394  
395  
396  
397  
398  
399  
400  
401  
402  
403  
404  
405  
406  
407  
408  
409  
410  
411  
412  
413  
414  
415  
416  
417  
418  
419  
420  
421  
422  
423  
424  
425  
426  
427

## ACKNOWLEDGEMENTS

We would like to thank all of the undergraduate students who helped run behavior for this experiment.



## REFERENCES

- 428  
429
- 430 1. Galliher-Beckley AJ, Cidlowski JA. Emerging roles of glucocorticoid receptor  
431 phosphorylation in modulating glucocorticoid hormone action in health and disease. *IUBMB*  
432 *Life*. 2009;61(10):979-86.
  - 433 2. Kassel O, Herrlich P. Crosstalk between the glucocorticoid receptor and other  
434 transcription factors: molecular aspects. *Mol Cell Endocrinol*. 2007;275(1-2):13-29.
  - 435 3. Sarabdjitsingh RA, Meijer OC, Schaaf MJ, de Kloet ER. Subregion-specific differences  
436 in translocation patterns of mineralocorticoid and glucocorticoid receptors in rat hippocampus.  
437 *Brain Res*. 2009;1249:43-53.
  - 438 4. van Steensel B, van Binnendijk EP, Hornsby CD, van der Voort HT, Krozowski ZS, de  
439 Kloet ER, et al. Partial colocalization of glucocorticoid and mineralocorticoid receptors in  
440 discrete compartments in nuclei of rat hippocampus neurons. *J Cell Sci*. 1996;109 ( Pt 4):787-92.
  - 441 5. de Kloet ER, Meijer OC, de Nicola AF, de Rijk RH, Joels M. Importance of the brain  
442 corticosteroid receptor balance in metaplasticity, cognitive performance and neuro-inflammation.  
443 *Front Neuroendocrinol*. 2018.
  - 444 6. McGaugh JL. The amygdala modulates the consolidation of memories of emotionally  
445 arousing experiences. *Annu Rev Neurosci*. 2004;27:1-28.
  - 446 7. Roozendaal B, McGaugh JL. Memory modulation. *Behav Neurosci*. 2011;125(6):797-  
447 824.
  - 448 8. Roozendaal B. 1999 Curt P. Richter award. Glucocorticoids and the regulation of  
449 memory consolidation. *Psychoneuroendocrinology*. 2000;25(3):213-38.

- 450 9. Roozendaal B, McGaugh JL. Amygdaloid nuclei lesions differentially affect  
451 glucocorticoid-induced memory enhancement in an inhibitory avoidance task. *Neurobiol Learn*  
452 *Mem.* 1996;65(1):1-8.
- 453 10. Quirarte GL, Roozendaal B, McGaugh JL. Glucocorticoid enhancement of memory  
454 storage involves noradrenergic activation in the basolateral amygdala. *Proc Natl Acad Sci U S A.*  
455 1997;94(25):14048-53.
- 456 11. Roozendaal B, McGaugh JL. Glucocorticoid receptor agonist and antagonist  
457 administration into the basolateral but not central amygdala modulates memory storage.  
458 *Neurobiol Learn Mem.* 1997;67(2):176-9.
- 459 12. Roozendaal B, Nguyen BT, Power AE, McGaugh JL. Basolateral amygdala  
460 noradrenergic influence enables enhancement of memory consolidation induced by hippocampal  
461 glucocorticoid receptor activation. *Proc Natl Acad Sci U S A.* 1999;96(20):11642-7.
- 462 13. Morris MC, Compas BE, Garber J. Relations among posttraumatic stress disorder,  
463 comorbid major depression, and HPA function: a systematic review and meta-analysis. *Clin*  
464 *Psychol Rev.* 2012;32(4):301-15.
- 465 14. Yehuda R, Southwick SM, Krystal JH, Bremner D, Charney DS, Mason JW. Enhanced  
466 suppression of cortisol following dexamethasone administration in posttraumatic stress disorder.  
467 *Am J Psychiatry.* 1993;150(1):83-6.
- 468 15. Yehuda R, Teicher MH, Trestman RL, Levengood RA, Siever LJ. Cortisol regulation in  
469 posttraumatic stress disorder and major depression: a chronobiological analysis. *Biol Psychiatry.*  
470 1996;40(2):79-88.

- 471 16. Yehuda R, Yang RK, Buchsbaum MS, Golier JA. Alterations in cortisol negative  
472 feedback inhibition as examined using the ACTH response to cortisol administration in PTSD.  
473 *Psychoneuroendocrinology*. 2006;31(4):447-51.
- 474 17. van Zuiden M, Geuze E, Willemsen HL, Vermetten E, Maas M, Heijnen CJ, et al. Pre-  
475 existing high glucocorticoid receptor number predicting development of posttraumatic stress  
476 symptoms after military deployment. *Am J Psychiatry*. 2011;168(1):89-96.
- 477 18. van Zuiden M, Kavelaars A, Geuze E, Olf M, Heijnen CJ. Predicting PTSD: Pre-existing  
478 vulnerabilities in glucocorticoid-signaling and implications for preventive interventions. *Brain*  
479 *Behav Immun*. 2012.
- 480 19. Yehuda R. Biology of posttraumatic stress disorder. *J Clin Psychiatry*. 2000;61 Suppl  
481 7:14-21.
- 482 20. de Kloet CS, Vermetten E, Bikker A, Meulman E, Geuze E, Kavelaars A, et al.  
483 Leukocyte glucocorticoid receptor expression and immunoregulation in veterans with and  
484 without post-traumatic stress disorder. *Mol Psychiatry*. 2007;12(5):443-53.
- 485 21. Finsterwald C, Alberini CM. Stress and glucocorticoid receptor-dependent mechanisms  
486 in long-term memory: from adaptive responses to psychopathologies. *Neurobiol Learn Mem*.  
487 2014;112:17-29.
- 488 22. Hauer D, Kaufmann I, Strewé C, Briegel I, Campolongo P, Schelling G. The role of  
489 glucocorticoids, catecholamines and endocannabinoids in the development of traumatic  
490 memories and posttraumatic stress symptoms in survivors of critical illness. *Neurobiol Learn*  
491 *Mem*. 2014;112:68-74.
- 492 23. Wingenfeld K, Wolf OT. Stress, memory, and the hippocampus. *Front Neurol Neurosci*.  
493 2014;34:109-20.

- 494 24. Schelling G, Briegel J, Roozendaal B, Stoll C, Rothenhausler HB, Kapfhammer HP. The  
495 effect of stress doses of hydrocortisone during septic shock on posttraumatic stress disorder in  
496 survivors. *Biol Psychiatry*. 2001;50(12):978-85.
- 497 25. Schelling G, Kilger E, Roozendaal B, de Quervain DJ, Briegel J, Dagge A, et al. Stress  
498 doses of hydrocortisone, traumatic memories, and symptoms of posttraumatic stress disorder in  
499 patients after cardiac surgery: a randomized study. *Biol Psychiatry*. 2004;55(6):627-33.
- 500 26. Suris A, Holliday R, Adinoff B, Holder N, North CS. Facilitating Fear-Based Memory  
501 Extinction With Dexamethasone: A Randomized Controlled Trial in Male Veterans With  
502 Combat-Related PTSD. *Psychiatry*. 2017;80(4):399-410.
- 503 27. Armario A, Escorihuela RM, Nadal R. Long-term neuroendocrine and behavioural  
504 effects of a single exposure to stress in adult animals. *Neurosci Biobehav Rev*. 2008;32(6):1121-  
505 35.
- 506 28. Bowers ME, Ressler KJ. An Overview of Translationally Informed Treatments for  
507 Posttraumatic Stress Disorder: Animal Models of Pavlovian Fear Conditioning to Human  
508 Clinical Trials. *Biol Psychiatry*. 2015;78(5):E15-27.
- 509 29. Deslauriers J, Toth M, Der-Avakian A, Risbrough VB. Current status of animal models  
510 of PTSD: behavioral and biological phenotypes, and future challenges in improving translation.  
511 *Biological Psychiatry*. 2017.
- 512 30. Eagle AL, Knox D, Roberts MM, Mulo K, Liberzon I, Galloway MP, et al. Single  
513 prolonged stress enhances hippocampal glucocorticoid receptor and phosphorylated protein  
514 kinase B levels. *Neurosci Res*. 2013;75(2):130-7.
- 515 31. George SA, Rodriguez-Santiago M, Riley J, Rodriguez E, Liberzon I. The effect of  
516 chronic phenytoin administration on single prolonged stress induced extinction retention deficits

- 517 and glucocorticoid upregulation in the rat medial prefrontal cortex. *Psychopharmacology (Berl)*.  
518 2014.
- 519 32. Knox D, Nault T, Henderson C, Liberzon I. Glucocorticoid Receptors And Extinction  
520 Retention Deficits In The Single Prolonged Stress Model. *Neuroscience*. 2012;223:163-73.
- 521 33. Liberzon I, Lopez JF, Flagel SB, Vazquez DM, Young EA. Differential regulation of  
522 hippocampal glucocorticoid receptors mRNA and fast feedback: relevance to post-traumatic  
523 stress disorder. *J Neuroendocrinol*. 1999;11(1):11-7.
- 524 34. Knox D, George SA, Fitzpatrick CJ, Rabinak CA, Maren S, Liberzon I. Single prolonged  
525 stress disrupts retention of extinguished fear in rats. *Learn Mem*. 2012;19(2):43-9.
- 526 35. Keller MS, Schreiber WB, Stanfield BR, Knox D. Inhibiting corticosterone synthesis  
527 during fear memory formation exacerbates cued fear extinction memory deficits within the single  
528 prolonged stress model. *Behav Brain Res*. 2015;287:182-6.
- 529 36. Knox D, Stanfield BR, Staib JM, David NP, Keller SM, DePietro T. Neural circuits via  
530 which single prolonged stress exposure leads to fear extinction retention deficits. *Learn Mem*.  
531 2016;23(12):689-98.
- 532 37. Yamamoto S, Morinobu S, Fuchikami M, Kurata A, Kozuru T, Yamawaki S. Effects of  
533 single prolonged stress and D-cycloserine on contextual fear extinction and hippocampal NMDA  
534 receptor expression in a rat model of PTSD. *Neuropsychopharmacology*. 2008;33(9):2108-16.
- 535 38. Milad MR, Orr SP, Lasko NB, Chang Y, Rauch SL, Pitman RK. Presence and acquired  
536 origin of reduced recall for fear extinction in PTSD: results of a twin study. *J Psychiatr Res*.  
537 2008;42(7):515-20.

- 538 39. Milad MR, Pitman RK, Ellis CB, Gold AL, Shin LM, Lasko NB, et al. Neurobiological  
539 basis of failure to recall extinction memory in posttraumatic stress disorder. *Biol Psychiatry*.  
540 2009;66(12):1075-82.
- 541 40. Milad MR, Rauch SL, Pitman RK, Quirk GJ. Fear extinction in rats: implications for  
542 human brain imaging and anxiety disorders. *Biol Psychol*. 2006;73(1):61-71.
- 543 41. Herry C, Johansen JP. Encoding of fear learning and memory in distributed neuronal  
544 circuits. *Nat Neurosci*. 2014;17(12):1644-54.
- 545 42. Maren S. Neurobiology of Pavlovian fear conditioning. *Annu Rev Neurosci*.  
546 2001;24:897-931.
- 547 43. Orsini CA, Maren S. Neural and cellular mechanisms of fear and extinction memory  
548 formation. *Neurosci Biobehav Rev*. 2012;36(7):1773-802.
- 549 44. Pape HC, Pare D. Plastic synaptic networks of the amygdala for the acquisition,  
550 expression, and extinction of conditioned fear. *Physiol Rev*. 2010;90(2):419-63.
- 551 45. Pare D, Quirk GJ, Ledoux JE. New vistas on amygdala networks in conditioned fear. *J*  
552 *Neurophysiol*. 2004;92(1):1-9.
- 553 46. Knox D, Perrine SA, George SA, Galloway MP, Liberzon I. Single prolonged stress  
554 decreases glutamate, glutamine, and creatine concentrations in the rat medial prefrontal cortex.  
555 *Neurosci Lett*. 2010;480(1):16-20.
- 556 47. Sawamura T, Klengel T, Armario A, Jovanovic T, Norrholm SD, Ressler KJ, et al.  
557 Dexamethasone Treatment Leads to Enhanced Fear Extinction and Dynamic Fkbp5 Regulation  
558 in Amygdala. *Neuropsychopharmacology*. 2016;41(3):832-46.

- 559 48. Uwaya A, Lee H, Park J, Lee H, Muto J, Nakajima S, et al. Acute immobilization stress  
560 following contextual fear conditioning reduces fear memory: timing is essential. *Behav Brain*  
561 *Funct.* 2016;12(1):8.
- 562 49. Daviu N, Andero R, Armario A, Nadal R. Sex differences in the behavioural and  
563 hypothalamic-pituitary-adrenal response to contextual fear conditioning in rats. *Horm Behav.*  
564 2014;66(5):713-23.
- 565 50. Spencer RL, Kalman BA, Cotter CS, Deak T. Discrimination between changes in  
566 glucocorticoid receptor expression and activation in rat brain using western blot analysis. *Brain*  
567 *Res.* 2000;868(2):275-86.
- 568 51. Maren S, Chang CH. Recent fear is resistant to extinction. *Proc Natl Acad Sci U S A.*  
569 2006;103(47):18020-5.
- 570 52. Wyrwoll CS, Holmes MC, Seckl JR. 11beta-hydroxysteroid dehydrogenases and the  
571 brain: from zero to hero, a decade of progress. *Front Neuroendocrinol.* 2011;32(3):265-86.
- 572 53. Yau JL, McNair KM, Noble J, Brownstein D, Hibberd C, Morton N, et al. Enhanced  
573 hippocampal long-term potentiation and spatial learning in aged 11beta-hydroxysteroid  
574 dehydrogenase type 1 knock-out mice. *J Neurosci.* 2007;27(39):10487-96.
- 575 54. Moisan MP, Seckl JR, Edwards CR. 11 beta-hydroxysteroid dehydrogenase bioactivity  
576 and messenger RNA expression in rat forebrain: localization in hypothalamus, hippocampus, and  
577 cortex. *Endocrinology.* 1990;127(3):1450-5.
- 578 55. Roland BL, Funder JW. Localization of 11beta-hydroxysteroid dehydrogenase type 2 in  
579 rat tissues: in situ studies. *Endocrinology.* 1996;137(3):1123-8.

- 580 56. Roland BL, Krozowski ZS, Funder JW. Glucocorticoid receptor, mineralocorticoid  
581 receptors, 11 beta-hydroxysteroid dehydrogenase-1 and -2 expression in rat brain and kidney: in  
582 situ studies. *Mol Cell Endocrinol.* 1995;111(1):R1-7.
- 583 57. Roland BL, Li KX, Funder JW. Hybridization histochemical localization of 11 beta-  
584 hydroxysteroid dehydrogenase type 2 in rat brain. *Endocrinology.* 1995;136(10):4697-700.
- 585 58. Wheelan N, Kenyon CJ, Harris AP, Cairns C, Al Dujaili E, Seckl JR, et al. Midlife stress  
586 alters memory and mood-related behaviors in old age: Role of locally activated glucocorticoids.  
587 *Psychoneuroendocrinology.* 2017;89:13-22.
- 588 59. Wang Z, Frederick J, Garabedian MJ. Deciphering the phosphorylation "code" of the  
589 glucocorticoid receptor in vivo. *J Biol Chem.* 2002;277(29):26573-80.
- 590 60. Ismaili N, Garabedian MJ. Modulation of glucocorticoid receptor function via  
591 phosphorylation. *Ann N Y Acad Sci.* 2004;1024:86-101.
- 592 61. Laukova M, Alaluf LG, Serova LI, Arango V, Sabban EL. Early intervention with  
593 intranasal NPY prevents single prolonged stress-triggered impairments in hypothalamus and  
594 ventral hippocampus in male rats. *Endocrinology.* 2014;155(10):3920-33.
- 595 62. Mitic M, Simic I, Djordjevic J, Radojicic MB, Adzic M. Gender-specific effects of  
596 fluoxetine on hippocampal glucocorticoid receptor phosphorylation and behavior in chronically  
597 stressed rats. *Neuropharmacology.* 2013;70:100-11.
- 598 63. Binder EB. The role of FKBP5, a co-chaperone of the glucocorticoid receptor in the  
599 pathogenesis and therapy of affective and anxiety disorders. *Psychoneuroendocrinology.* 2009;34  
600 Suppl 1:S186-95.
- 601 64. Pratt WB, Toft DO. Steroid receptor interactions with heat shock protein and  
602 immunophilin chaperones. *Endocr Rev.* 1997;18(3):306-60.



- 603 65. Denny WB, Valentine DL, Reynolds PD, Smith DF, Scammell JG. Squirrel monkey  
604 immunophilin FKBP51 is a potent inhibitor of glucocorticoid receptor binding. *Endocrinology*.  
605 2000;141(11):4107-13.
- 606 66. Maddox SA, Schafe GE, Ressler KJ. Exploring epigenetic regulation of fear memory and  
607 biomarkers associated with post-traumatic stress disorder. *Front Psychiatry*. 2013;4:62.

608

609

610

611

612

613

614

615

616

617

618

619

620

621

622

623

624

625

626

627

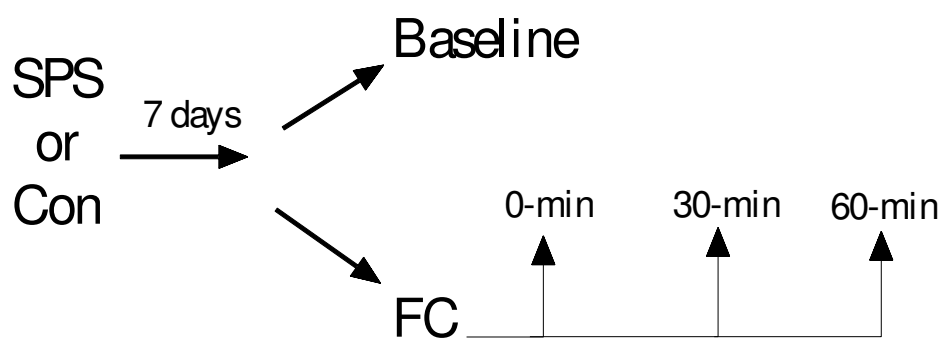

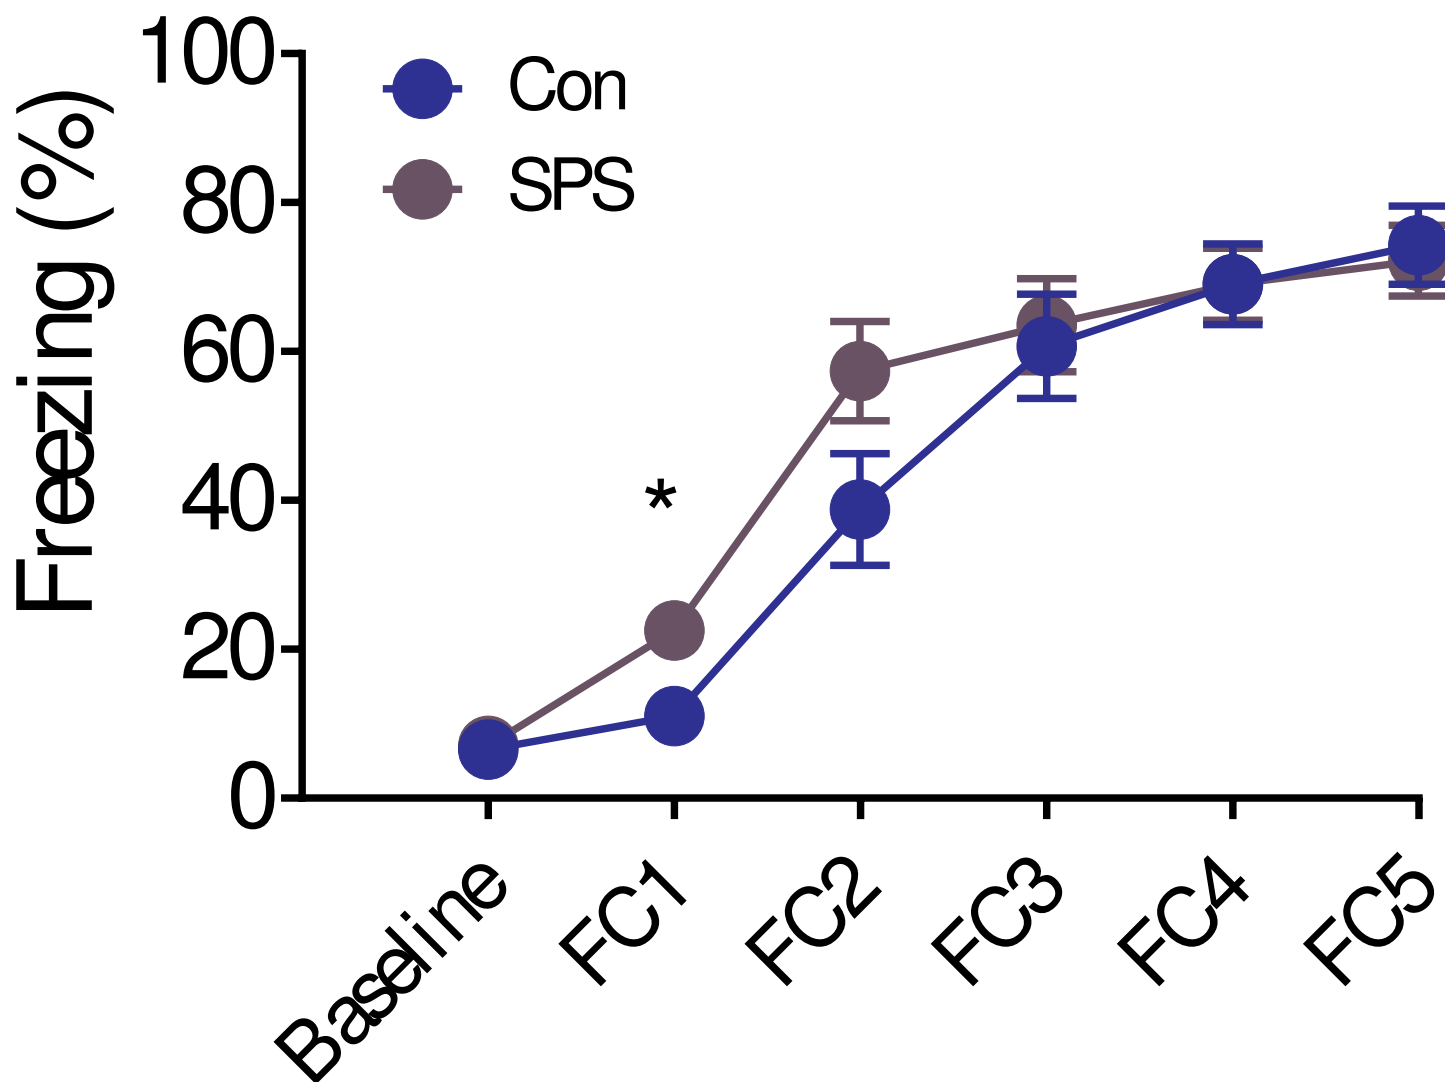

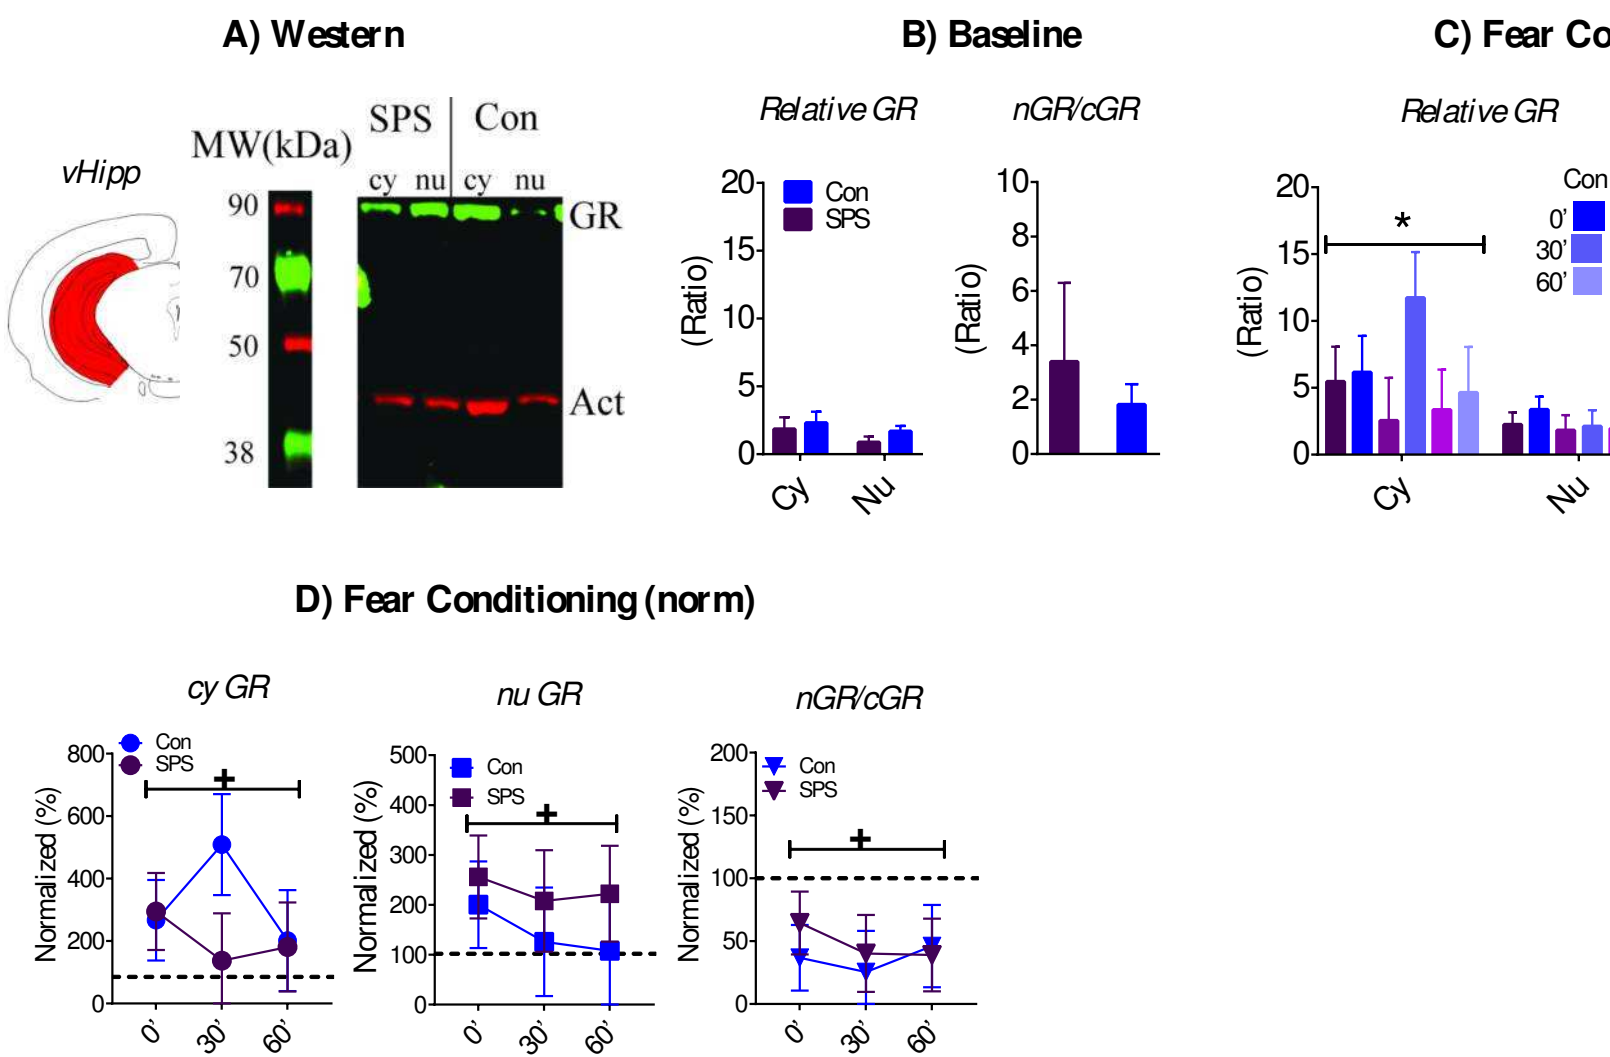

### A) Western

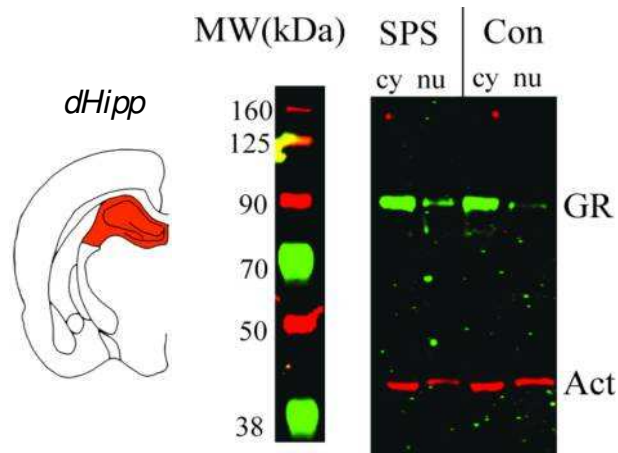

### B) Baseline

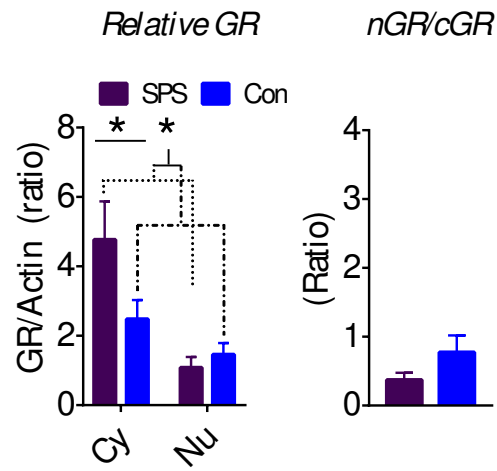

### C) Fear Conditioning

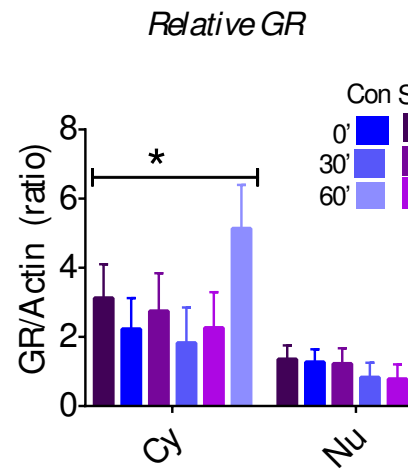

### D) Fear Conditioning (norm)

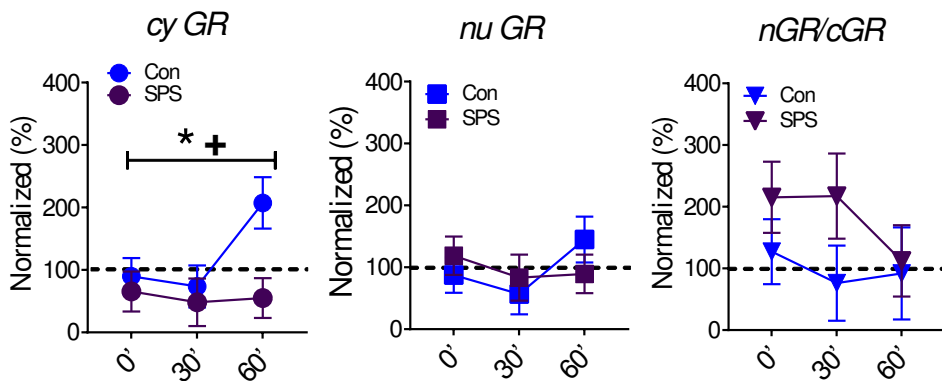

### A) Western

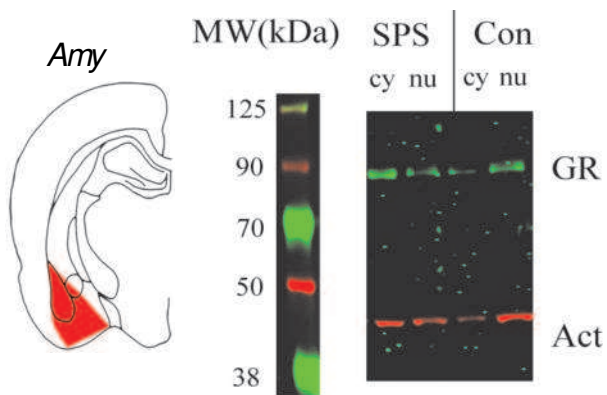

### B) Baseline

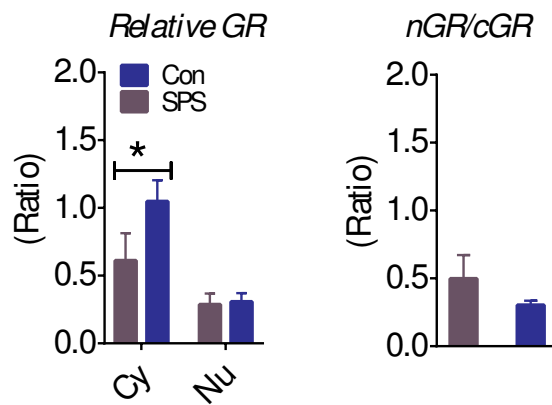

### C) Fear Con

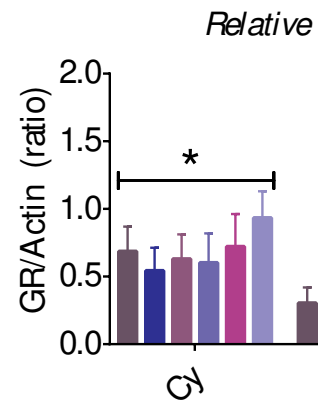

### D) Fear Conditioning (norm)

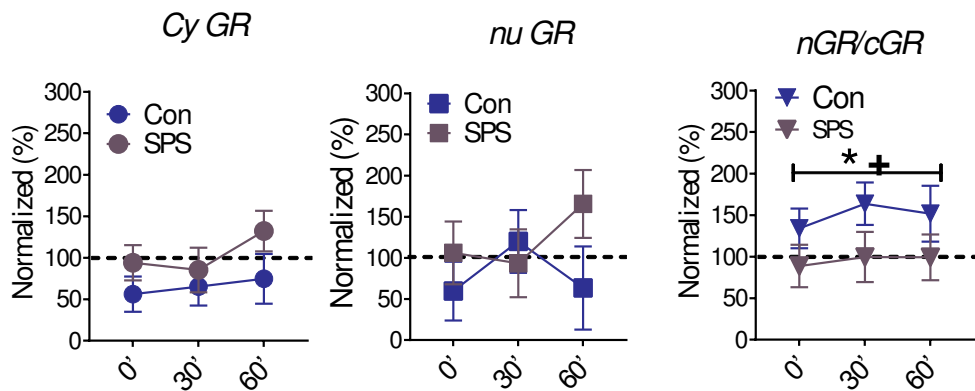

### A) Western

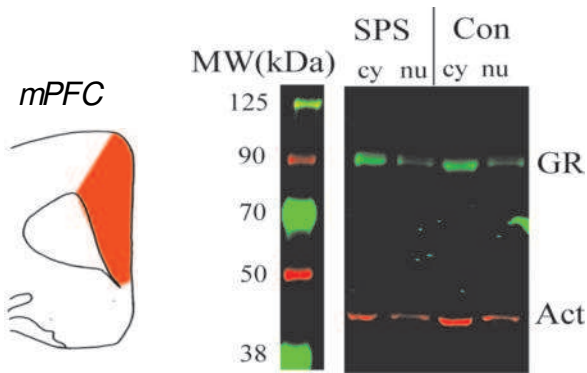

### B) Baseline

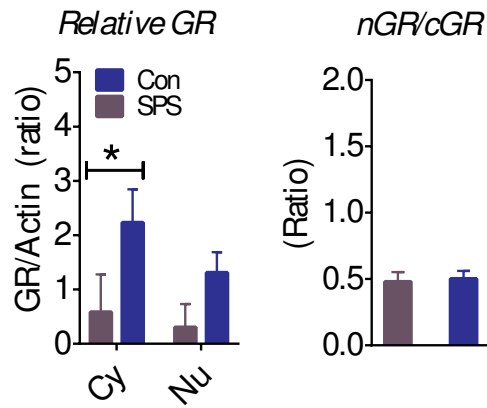

### C) Fear

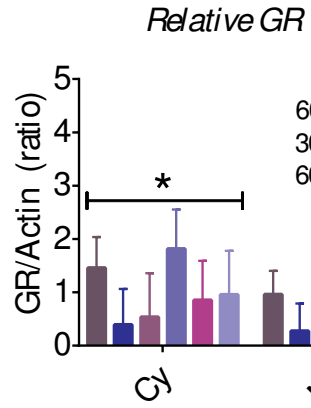

### D) Fear Conditioning (norm)

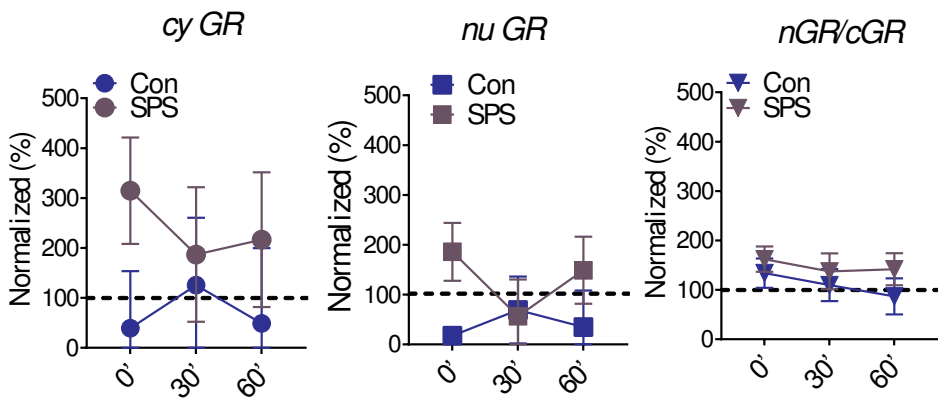

Source: http://biorxiv.org/content/10.1101/424101v1.full.pdf
